# Supplementary material for: International Dispersal of Dengue through Air Travel: Importation Risk for Europe
Source: PubMed Central journal article supplement (PMC4256202; doi:10.1371/journal.pntd.0003278), 2014-12-04

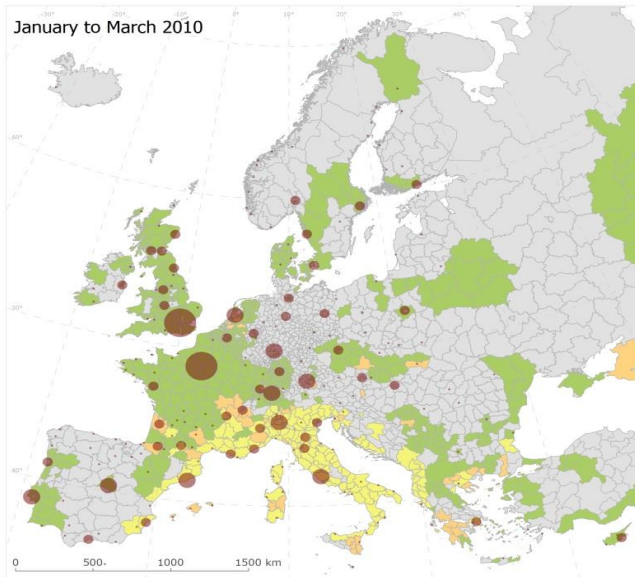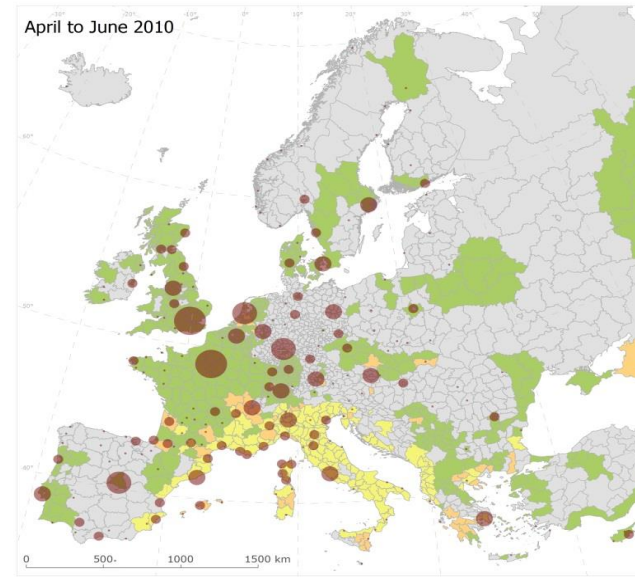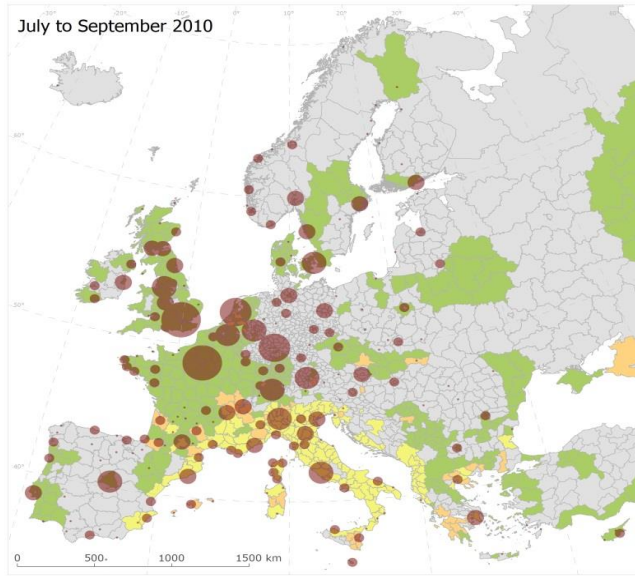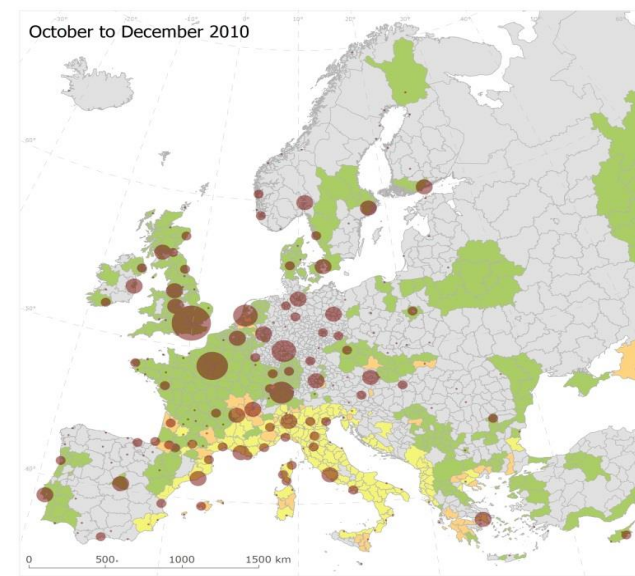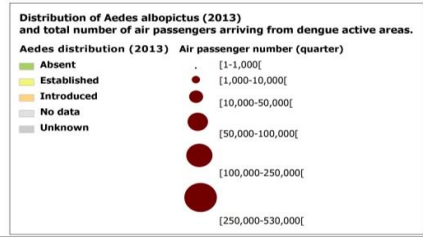

Supplement: pntd.0003278.s001.pdf [file pntd.0003278.s001.pdf]
